# Supplementary material
Source: PubMed Central journal article supplement (PMC7399750)
Supplement: jamainternmed-180-1070-s002.pdf [file jamainternmed-180-1070-s002.pdf]

## Supplementary Online Content

Mitchell SL, Volandes AE, Gutman R, et al. Advance care planning video intervention among long-stay nursing home residents: a pragmatic cluster randomized clinical trial. *JAMA Intern Med*. Published online July 6, 2020. doi:10.1001/jamainternmed.2020.2366

**eTable 1.** Use of Burdensome Treatments Among Long-Stay Residents With and Without Advanced Illness

**eTable 2.** Coding Scheme to Define Burdensome Treatments

This supplementary material has been provided by the authors to give readers additional information about their work.

**eTable 1: Use of Burdensome Treatments among Long-Stay Residents with and without Advanced Illness.**

|                                 | Long-stay with Advanced Illness |      |                     |      | Long-stay without Advanced Illness |     |                      |     |
|---------------------------------|---------------------------------|------|---------------------|------|------------------------------------|-----|----------------------|-----|
|                                 | Intervention<br>(N=4171)        |      | Control<br>(N=8308) |      | Intervention<br>(N=5766)           |     | Control<br>(N=11782) |     |
|                                 | N                               | %    | N                   | %    | N                                  | %   | N                    | %   |
| Any Burdensome Treatment        | 453                             | 10.9 | 971                 | 11.7 | 465                                | 8.1 | 1028                 | 8.7 |
| Number of treatments:           |                                 |      |                     |      |                                    |     |                      |     |
| 1                               | 293                             | 7.0  | 600                 | 7.2  | 319                                | 5.5 | 649                  | 5.5 |
| 2                               | 121                             | 2.9  | 305                 | 3.7  | 117                                | 2.0 | 314                  | 2.7 |
| 3+                              | 39                              | 0.9  | 66                  | 0.8  | 29                                 | 0.5 | 65                   | 0.6 |
| Type of Burdensome Treatment    |                                 |      |                     |      |                                    |     |                      |     |
| Intensive care unit admission   | 147                             | 3.5  | 351                 | 4.2  | 134                                | 2.3 | 346                  | 2.9 |
| Tub-feeding                     | 119                             | 2.9  | 269                 | 3.2  | 94                                 | 1.6 | 236                  | 2.0 |
| Invasive Mechanical Ventilation | 157                             | 3.8  | 357                 | 4.3  | 151                                | 2.6 | 372                  | 3.2 |
| Parenteral therapy              | 233                             | 5.6  | 435                 | 5.2  | 263                                | 4.6 | 522                  | 4.4 |

*Burdensome treatments include tube-feeding, parenteral therapy (for hydration or medication delivery), invasive mechanical intervention, and admission to an intensive care unit.*

**eTable 2.** Coding Scheme to Define Burdensome Treatments

| <b>Burdensome Treatment</b>     | <b>Minimum DataSet Items</b> | <i>International Statistical Classification of Diseases and Related Health Problems 10 codes from Medicare Claims</i>                                                           | <b>Healthcare Common Procedure Coding System Codes from Medicare Claims</b> |
|---------------------------------|------------------------------|---------------------------------------------------------------------------------------------------------------------------------------------------------------------------------|-----------------------------------------------------------------------------|
| Feeding Tube                    | K0510B1, K0510B2             | 0DH63UZ, 0DH64UZ, 0D16074, 0D160J4, 0D160K4, 0D160Z4, 0D163J4, 0D16474, 0D164J4, 0D164K4, 0D164Z4, 0D16874, 0D168J4, 0D168K4, 0D168Z4, 0DH60UZ, 0DW04UZ, 0DW08UZ, 3E0G36Z, Z931 | 43246, 43750, 43653, 43830, 43832, 44373, 44372, 74350                      |
| Invasive Mechanical Ventilation | O0100F1, O0100F2             | 5A1935Z, 5A1945Z, 5A1955Z, 5A1935Z, 5A1945Z, 5A1955Z                                                                                                                            | N/A                                                                         |
| Parenteral therapy              | K0510A1, K0510A2             | N/A                                                                                                                                                                             | N/A                                                                         |
| Intensive Care Unit admission   | N/A                          | Revenue Center Codes: 0200 - 0219                                                                                                                                               | N/A                                                                         |
