# Supplementary material
Source: PubMed Central journal article supplement (PMC7399750)
Supplement: jamainternmed-180-1070-s003.pdf [file jamainternmed-180-1070-s003.pdf]

## Data Sharing Statement

Mitchell. Advance Care Planning Video Intervention Among Long-Stay Nursing Home Residents. *JAMA Intern Med.* Published June 29, 2020. 10.1001/jamainternmed.2020.2366

### Data

**Data available:** Yes

**Data types:** Deidentified participant data

**How to access data:** Data request should be made to [vincent\\_mor@brown.edu](mailto:vincent_mor@brown.edu)

**When available:** With publication

### Supporting Documents

**Document types:** None

### Additional Information

**Who can access the data:** researchers whose proposed use of the data has been approved

**Types of analyses:** A a specified purpose

**Mechanisms of data availability:** signed data access agreement
